# Supplementary material for: Do-it-yourself biology: challenges and promises for an open science and technology movement
Source: Springer Nature journal article supplement (doi:10.1007/s11693-013-9116-4), 2013-08-01
Supplement: MOESM1 [file 11693_2013_9116_MOESM1_ESM.xls]

## Sheet: Sheet1
Categories	Medical Diagnostic	Medical Cure	Medical Cure - Cancer	Medical Cure - Infectuous Disease	Vaccines - Antiviral	Food	Energy (Biofuels/bioplastics & Bioremediation) :	Environment monitoring	Depollution	Environmental prevention	Teams involving or citing DIYbio groups	Control of GMO dispersion
	2005 : Toronto: thermometer	2006 : Duke: cancer detection and treatment / internal diagnostic	2006 : Duke: cancer detection and treatment / internal diagnostic	2006 : Ljubljana: inflammation control module	2007 : Ljubljana: anti-HIV defense	2007 : Edinburgh: yogurt hacking	2007 : Duke: fuel cell	2005 : Davidson: chemical decoder	2007 : MIT: mercury water decontamination bacterial system	2009 : Team HKUST: SynBiological Bug Buster	2009 : Team NTU-Singapore: DIYbio's future	2012: Team NYMU-Taipei: E.coli stay inside Dictyostelium discoideum
	2006 : Arizona: cheap diagnostic paper	2006 : Harvard: DNA box for drug delivery	2007 : Princeton: detection and destruction of cancer cell	2007 : Caltech: bacteriophage therapy	2008 : Slovenia: vaccine against H. Pylori	2008 : Edinburgh: A weapon of mass nutrition: The conversion of waste cellulosic biomass into starch and beta-carotene	2007 : Alberta: butanol production	2006 : Chiba: light sensor associated with smell production	2008 : Beijing: PCB detector and degrador	2009 : Team Nevada: Cinnamicide: Producing a Natural Insecticide against Mosquito Larvae in E. coli and Duckweed	2010 : Team Alberta: GENOMIKON: An Educational Tool Kit for Rapid Genetic Construction	2012: Team SEU_A: Toxic Apple. Fusion of a benefic gene to a killer switch to facilitate its conervation.
	2006 : Duke: cancer detection and treatment / internal diagnostic	2006 : Ljubljana: inflammation control module	2009 : Team Bay_Area_RSI: Breast cancer cell targeting phage	2007 : Rice: phage-mediated killing of antibiotic resistant bacteria	2009 : Team NYMU-Taipei: ViroCatcher	2008 : Guelph: beta carotene production	2007 : Calgary: solar energy absorption	2006 : Edinburgh: arsenic detection	2008 : METU Turkey: Light Controlled Metal Carrying E. coli	2010 : Team NCTU_Formosa: Mosquito Intelligent Terminator, a genetically engineered, temperature controlled E. coli for killing wrigglers	2010 : Team Cornell: Human practices	2012: Team Paris_Bettencourt: bWARE containment module to sybstancially reduce the risk of Horizontal Gene Transfer.
	2006 : Ljubljana: inflammation control module	2007 : Bay Area RSI: stem cell differentiation toward heart infarcted repairing	2009 : Team Purdue: Engineered Microglia to Locate CD133+ Tumor-Initiating Cells	2008 : NTU-Singapour: Engineering Colicin E7 production system to inhibit Enterohemorrhagic Escherichia Coli O157:H7	2009 : Team Todai-Tokyo: Prevention of Lifestyle Diseases Using Synthetic Organisms	2008 : MIT: prevention of caries with hacked yogurt	2007 : irginia: butanol biosynthesis	2006 : Colombia: iron detection	2008 : Mississippi State: Genetically Engineered System for Lignin Biodegradation using Lignin Peroxidase A	2012 : Team Toronto: Engineering plants for increased capacity to use phosphorus in the soil, decreasing the need for fertilizer.	2010 : Team ArtScienceBangalore: Jugaad DIY BioLab	2012 : Team University_College_London: Multi-containement system using three toxin/anti-toxin pairs.
	2006 : Toronto: thermometer	2007 : Berkeley: bactoblood	2009 : Team Warsaw: BacInVader – a new system for cancer genetic therapy	2009 : Team SDU-Denmark: Bacto Bandage - Quorum-quenching S. Aureus Biofilm Formation, One Peptide at a Time		2008 : Rice: Resveratrol enrichment of beer for health protective effect	2007 : Boston: electrogenic bacteria	2006 : Prairie view: iron and sulfur detection	2008 : Alberta: The Detection and Degradation of Bisphenol A in the Environment: An Antidote For Poisonous Plastic.	2012 : JUIT-India: Engineered Methylcoccus capsulatus that converts methane into carbon dioxyde	2010 : Team Baltimore_US: DIY-GEM: a path towards low cost high throughput gene synthesis	2012 : Team Colombia: A detect and alert system.
	2007 : Harvard: bio targeting	2007 : Caltech: bacteriophage therapy	2010 : Team Freiburg_Bioware: A Modular Virus Construction Kit for Therapeutic Applications	2009 : Team Stanford: Immuni-T. coli: A Probiotic Approach to Diagnosing and Treating Inflammatory Bowel Disease (IBD)		2009 : Team uOttawa: A probiotic Lactobacillus strain which produces cellulose	2008 : Duke: degradable bio plastic	2006 : Valencia: biosensor	2008 : Lethbridge: targeting and degrading PCBs (gasoline derivatives)	2012 : Team Korea_U_Seoul: Reducing the impact of Bacterialleaf blight (BLB) on rice cultures by detecting the disease marker Ax21, triggering release of bactericide	2011 : Team Cambridge: Society Questionnaire
	2007 : Imperial College: biofilm infection detector	2007 : Harvard: bio targeting	2010 : Team UCSF: Synthetic Killers - engineering immune cells for cancer therapy	2010 : Team British_Columbia: A Multi-pronged Approach to Eliminating Staphylococcus aureus Biofilms Using Recombinant Bacteriophage and Biofilm-Degrading Enzymes		2010 : Team The_Citadel-Charleston: Appetuners: A System for the Expression and Control of Appetite Regulation Peptides in E.coli	2008 : Utah State: bio plastic production	2007 : Brown: lead biosensor	2009 : Team Groningen: Heavy metal scavengers with a vertical gas drive	2012 : Team ETH_Zurich: E. colipse. Intelligent and adaptive sun radiation protection system. Engineered E. coli producing the protecting agent para-aminobenoic acid (PABA)	2011 : Team Columbia-Cooper: Environmentally-friendly manufacture of quantum dots in E. coli
	2007 : Princeton: detection and destruction of cancer cell	2007 : Paris: fat absorption system	2011 : Team KIT-Kyoto: Mr.D -who will cure leukemia-	2010 : Team EPF_Lausanne: Asaia, the pink force against malaria		2010 : Team TzuChiU_Formosa: Nutrient synthesizer	2008 : Wisconsin: sorbitol production (biofuel precursor)	2007 : Colombia: iron detection	2009 : Team IPOC2-Colombia: Molecular Device that Biodegrades Pesticide		2011 : Team Freiburg: SynBio Oath
	2008 : Heidelberg: Engineering E.coli for targeting pathogenic microorganisms	2007 : Princeton: detection and destruction of cancer cell	2011 : Team Potsdam_Bioware: Modification, Selection and Production of Cyclic Peptides for Therapy	2010 : Team HKUST: Engineered Lactobacillus against S. aureus Infection		2011 : Team Johns_Hopkins: VitaYeast: addressing malnutrition with synthetic vitamin production in baker’s yeast	2009 : Team CityColSanFrancisco: Fuel Cell	2007 : ETHZ: biosensor	2009 : Team Michigan: The Toluene Terminator		2012 : Team Edinburgh: bio-electric interface, new slectable and conterselectable markers and new chassis (Citrobacter freundii). DIYbiology and the world of tomorrow
	2008 : Illinois: Cell-based and in vitro antigenic sensors for medical diagnostics	2007 : Rice: phage-mediated killing of antibiotic resistant bacteria	2012 : Team Penn: Novel targeting therapeuthics platform for treating cancer	2010 : Team St_Andrews: Tackling Vibrio cholerae by introducing genetically re-engineered Escherichia coli to the human alimentary tract		2011 : Team UTP-Panama: THERMOGENIC RESPONSE NUTRIENT BIOSENSOR (THE RENBO)	2009 : Team Duke: One-Step Construction of a Bioplastic Production Pathway in E. coli	2007 : Freiburg: calcium and light biosensor	2009 : Team Newcastle: Bac-man: sequestering cadmium into Bacillus spores		2012 : Team NYU_Gallatin (with Gensapce): Aseatobacter, how to grow chairs :)
	2008 : TUDelft: bio-thermometer	2007 : Taipei: insulin production for homeostatic response.	2012 : Team KAIT_Japan: E. col that can detect and kill cancer cells by releasing azurin.	2010 : Team Washington: Antibiotics for the 21st Century		2011 : Team HIT-Harbin: The Reform of Two Strains in Yogurt	2009 : Team Missouri_Miners: A Synthetic Biology Apporach to Microbial Fuel Cell Development Utilizing E. Coli	2007 : Glasgow: hybrid electrico/bio sensor	2009 : Team UQ-Australia: Mercury sequestration using a multicomponent operon, and increasing the temperature tolerance range of P. syringae.		2012: Team Evry: Welocme to synthetic Physiology. Using tadpole as a vertebrate chassis for iGEM and synthetic biology in general. Human practices project done with La Paillasse
	2009 : Team Bay_Area_RSI: Breast cancer cell targeting phage	2008 : Bay Area RSI: stem cell differentiation toward heart infarcted repairing	2012 : Team HKUST-Hong_Kong: B. hercules. Engineered B. subtilis that can recognize and kill colon carcinoma	2011 : Team GeorgiaTech: De Novo Adaptation of Streptococcus thermophilus CRISPR1 Defense in Bacillus Subtilis		2011 : Team Cornell: BioFactory	2009 : Team Missouri_Miners: A Synthetic Biology Apporach to Microbial Fuel Cell Development Utilizing E. Coli	2007 : PennState: radiation bio dosimeter	2009 : Team Virginia: Arsenic Sequestration for Groundwater Decontamination		2012 : Team University_College_London: Salt tolerant E. coli, new selctable markers that are not antibiotics. The first public biobrick
	2009 : Team Brown: Engineering Staphylococcus Epidermidis to Secrete Recombinant Histamine Binding Protein in Response to Changing Histamine Concentration	2008 : Caltech: probiotic bacteria (production of treatment in the gut)	2012 : Team KIT-Kyoto: Introduction of Drosophila meanogaster as a model organism for human leukemia.	2011 : Team Grinnell: Exploiting the Secretion System of Environmental Caulobacter crescentus to Deliver Biofilm-inhibiting Proteins		2011 : Team WashU: Engineering Carotenoid Biosynthesis in Saccharomyces cerevisiae. Vitamin A deficiency causes blindness in over 250,000 children annually	2009 : Team UNIPV-Pavia: Ethanol? Whey not!	2007 : Prairie view: multi-metal detector	2009 : Team UChicago: An enhanced yeast-based system for detection and decontamination of organophosphate neurotoxins.
	2009 : Team Cambridge: E. Chromi: Triggering Pigment Production in E. Coli	2008 : KULeuven: bacterial drug delivery system	2012 : Team Westminster: Fighting cancer from the inside out. Targetting and destroying Cancer stem cells using engineered bacteria	2011 : Team UT_Dallas: “Immunobots: a step towards intelligent probiotics”		2012 : Team WashU: Producing Saffron main components in bacteria and algae	2009 : Team Uppsala-Sweden: Booze Bugs : Sun To Alcohol	2007 : St Petersburg: copper biosensor	2010 : Team Korea_U_Seoul: Heavy Metal Gang Captured By Capsule Cop
	2009 : Team Purdue: Engineered Microglia to Locate CD133+ Tumor-Initiating Cells	2008 : NTU-Singapour: Engineering Colicin E7 production system to inhibit Enterohemorrhagic Escherichia Coli O157:H7	2012 : Team NTNU_Trondheim: Bacterial Anti-Cancer Kamikaze.	2012 : Team HIT-Harbin: Engineered E. coli bacteria to detect and kill Staphylococcus aureus		2012 : Team NorthWestern: Phytastic, a bioenhencer of iron bioavailability in the gut to fight anemia.	2009 : Team Wisconsin-Madison: Ocean Fuel: increased salt tolerance through glycine betaine production	2007 : Southern Utah: cyanide biosensor	2010 : Team Lethbridge: A synthetic biology based approach for bioremediation of the tailings ponds
	2009 : Team Stanford: Immuni-T. coli: A Probiotic Approach to Diagnosing and Treating Inflammatory Bowel Disease (IBD)	2009 : Team Bay_Area_RSI: Breast cancer cell targeting phage		2012 : Team Baskent_Meds: Engineered bacteria that can sense and kill Legionella pneumophila.		2012 : Team Minnesota: Engineering Caffeine Biosynthesis in Baker's Yeast	2010 : Team Caltech: Towards the Production of a Bioplastic Bioprinter and Design for a General Printing Framework	2008 : Beijing: PCB detector and degrador	2010 : Team Michigan: Algae Bioflocculation for Biofuel Production and Bioremediation of Oil Sands Tailings Water
	2010 : Team Imperial_College_London: Parasight – Parasite detection with a rapid response	2009 : Team Brown: Engineering Staphylococcus Epidermidis to Secrete Recombinant Histamine Binding Protein in Response to Changing Histamine Concentration		2012 : Team Uppsala_University: sRNA to downregulate antibiotic resistance in infectious agents.		2012 : Team Colorado_State: The gluten-free beer!	2010 : Team Missouri_Miners: The Electric Microbe: Making A Fuel Cell With E. coli	2008 : Brown: water pollution detector based on conductance of bacteria	2010 : Team Peking: Heavy Metal Decontamination Kit
	2010 : Team KAIST-Korea: DiscoverY: universal diagnostic yeast	2009 : Team METU-Gene: A Fast Healing Mechanism; Wound Dressing		2012 : Team Dundee: Six, Lyse and Obliterate: a synthetic silver bullet against healthcare aquired infection. Clostridium difficile-targeting engineered E. coli		2012 : Team Nevada: The iRICE system.Using a Starch-binding protein to connect nutrient-related proteins and rice starch.	2010 : Team Monash_Australia: Design and construction of a biological ethylene generation device	2008 : Harvard: Bacterial Biosensors with Electrical Output	2012 : Team Clemson: Biphenyl Degradation by Pollutant Targeting, Biosurfactant Production, and Overexpression of Catabolic Enzymes
	2010 : Team Waterloo: Staphiscope: diagnosis of S. aureus through bacterial wiretapping	2009 : Team NTU-Singapore: Plaque Out! alternative treatment for atherosclerosis		2012 : Team Lyon-INSA: The biofilm killer. Engineered Bacillus subtilis to destroy biofilm and protect surface from future formation		2012 : Team WHU-China: E.coslim to regulate the microbiome composition in intestine to reduce risks of obesity	2010 : Team Michigan: Algae Bioflocculation for Biofuel Production and Bioremediation of Oil Sands Tailings Water	2008 : Alberta: The Detection and Degradation of Bisphenol A in the Environment: An Antidote For Poisonous Plastic.	2012 : Team Purdue: Stronger biofilms for more efficient and cleaner waste water treatment
	2010 : Team WITS-South_Africa: Lactoguard: A commensal whole-cell bionsensor for the diagnosis of sexually transmitted infections	2009 : Team Paris: Message in a Bubble: a robust inter-cellular communication system based on outer membrane vesicles.				2012 : Team Nanjing-China: engineered lettuce producing artificial small RNA targeting PGC1-alpha, whose high expression in liver can cause insulin resistance.	2010 : Team ULB-Brussels: Hydrocoli : How to make wastewater our new green energy source	2008 : Lethbridge: targeting and degrading PCBs (gasoline derivatives)	2012 : Team British_Columbia: Synthetic Syntropy, engineering a tunable consortium with a distributed 4S desulfurization pathway for increased efficiency in the removal of organosulfurs in heavy oils and bitumen resources
	2011 : Team West_Point: Visual Detection of Cholera via Modified E. Coli	2009 : Team Purdue: Engineered Microglia to Locate CD133+ Tumor-Initiating Cells				2012 : Team Frankfurt: Production of sweetening agents in Saccharomyces cerevisiae	2011 : Team Alberta: Genetically engineering a common fungus to produce biodiesel from cellulosic waste.	2009 : Team British_Columbia: Development of a modular, analog E. coli biosensor	2012 : Team Calgary: Toxin-sensing and degrading organisms to detect and destroy tailings ponds and turn them into useable hydrocarbons
	2012 : Team Virginia: Genetically engineered bacteriophage for diagnosis of whooping cough	2009 : Team Queens: Plaque Busters: A Synthetic Biology Approach to Targeted Drug Delivery Treatment of Atherosclerosis				2012 : Team St-Andrews: Omega-3 fatty acids synthesis in E. coli.	2011 : Team British_Columbia: iSynthase: Mass production of terpenes in yeast	2009 : Team Cornell: Engineering the Bacillus Subtilis Metal Ion Homeostasis System to Serve as a Cadmium Responsive Biosensor	2012 : Team Auxin_Texas: Sensing and degrading caffeine using engineered E. coli bacteria
	2012 : Team BYUProvo: Biosensors for cancer cell signatures (Rreactive oxygen species, increased tempreatures, and lactate)	2009 : Team SDU-Denmark: Bacto Bandage - Quorum-quenching S. Aureus Biofilm Formation, One Peptide at a Time				2012 : Team Trieste: The Jolly JoCare. A safe probiotic platform for protein expression	2011 : Team Nevada: So Happy Together: A Cooperative Relationship between Cyanobacteria and E. Coli for production of biofuels	2009 : Team Edinburgh: Defusing a dangerous world: a biological method for detection of landmines	2012 : Team Washington: Plastic degradation. Engineered bacteria that degrade and live on polyurethane (PUR).
	2012 : Team Arizona_State: Chimeric reporter systems for detecting pathogens presence	2009 : Team Stanford: Immuni-T. coli: A Probiotic Approach to Diagnosing and Treating Inflammatory Bowel Disease (IBD)				2012 : Team TU_Munich: TUM-Brew, the SynBio Beer. Expression of Limonene, thaumatin and caffeine in the Baker's yeast.	2011 : Team Tec-Monterrey: E. Coli's Sweet Deal	2009 : Team Gaston_Day_School: Development of a Red Fluorescent Nitrate Detector	2012 : Team UC_Davis: Biodegradation of polyethylene terephthalate (PET).
	2012 : Team Nanjing_China_Bio: Detection of tumor using engineered bacteria that can sense nutrient-rich and oxygen-poor areas.	2009 : Team SupBiotech-Paris: Double vectorisation system (DVS)				2012 : Team Exeter: Biosynthesis of polysaccharide.	2011 : Team UNAM-Genomics_Mexico: Hydrobium etli	2009 : Team KU_Seoul: Integrated Heavy Metal Detection System	2012 : Team BAU-Indonesia: Biodegradation of polyethylene terephthalate (PET).
	2012 : Team Chalmers-Gothenburg: Development of a biodegradable pregnancy test kit by engineering S. cerevisiae to detect the hCG hormone	2009 : Team Tsinghua: Syn-genome Based Gensniper				2012 : Team SDU-Denmark: Sucrose limitation and Inulin Metabolism. Probiotic E. coli to produce inulin to reduce plasma lipopolysaccharide (LPS)	2011 : Team VCU: Production of Isoprenoids in Synechococcus: A model for sustainable manufacturing	2009 : Team UAB-Barcelona: A toxics biosensor. Could bacteria detect instantaneous and simultaneously several types of pollutants?	2012 : Team CD-SCU-CHINA: Oil spill degradation system using engineered E. coli
	2012 : Team TU-Delft: an olfactory device for the purpose of characterization of volatile compound, using S. cerevisiae	2009 : Team UC_Davis: A Bacterial Secretion System Motivated by the Goal of Managing Celiac Disease				2012 : Team Groningen: The food warden. Engineered Bacillus subtilis to detect meat spoilage.	2011 : Team Washington: Make it or Break it: Diesel Production and Gluten Destruction, the Synthetic Biology Way	2010 : Team BCCS-Bristol: agrEcoli: Smarter farming through bacterial soil fertility sensors	2012 : Team NYMU-Taipei: Venus marvel. Engineered cyanobacteria that can metabolize nitrogen, sulfur and carbon oxydes. + Engineered E. coli that can collect cadmium ions.
	2012 : Team Fatih-Medical: Early diagnosis of cancer by enginnering E .coli to detect Epithelial cell adhesion molecule on circulating tumor cells.	2009 : Team ULB-Brussels: GluColi, a new generation of glue					2011 : Team Korea_U_Seoul: Synthesis of Synthetic Micro-Alkanes (“Synfuels”) in Engineered Escherichia coli	2010 : Team BIOTEC_Dresden: SensorBricks	2012 : Team TMU-Tokyo: Chef Ant E. coli. Formaldehyde detoxification using engineered E. coli.
	2012 : Team Paris-Saclay: GEMOTE. Biosensor for temperature.	2009 : Team Warsaw: BacInVader – a new system for cancer genetic therapy					2012 : Team Queens_Canada: Better remediation and biosynthesis using bacteria	2010 : Team Gaston_Day_School: Construction of a Biological Iron Detector in a Secondary School Environment	*2012 : Team St-Andrews: Novel Metal binding proteins for precious and toxic metal recovery.
	2012 : Team Tsinghua-D: A computer-aided temperature-response Regulatory RNA design	2009 : Team Imperial College London: The E.ncapsulator					2012 : Team John_Hopkins-Wetware: OptiYeast for a more optimizedand controllable bioproduction process	2010 : Team IvyTech-South_Bend: To Swim or Not to Swim?rapidly indirectly quantifying the presence of enteric bacteria in natural water samples through the detection of quorum sensing factors	2012 : Team University_College_London: Plastic Republic - Constructing an island from microplastic waste
		2010 : Team Panama: Standardization of Rhamnosiltransferase 1 gene (rhlAB) into a Biobrick for rhamnolipid production in E. coli					2012 : Team Rutgers: Engineered bacteria strain that produce 1-butanol	2010 : Team Nevada: Development of Plant Biosensors for Environmental Monitoring Using Nicotiana tabacum Protoplasts as Transgenic Plant Models	2012 : Team Leicester: Engineering Pseudomonas bacteria to degrade faster polystyrene.
		2010 : Team British_Columbia: A Multi-pronged Approach to Eliminating Staphylococcus aureus Biofilms Using Recombinant Bacteriophage and Biofilm-Degrading Enzymes					2012 : Team Lethbridge: CAB extraction method for carbonate oil deposits mining with reduced greenhouse gas emissions	2010 : Team Sheffield: iCOLI: A water-borne pathogen detection system and an exploration of identity in synthetic biology	2012 : Team Bielefeld-Germany: A biological filter using immobilized laccases to purify municipal and industrial waste water from synthetic estrogens and other aromatics compounds.
		2010 : Team Cornell: OMG OMVs! Outer membrane vesicles (OMVs) are natural secretion					2012 : Team UC-Merced: E. hydro Express: stramlining Bacterial Production of Hydrogen Gas	2010 : Team Stanford: EscheRatio coli: Novel Sensors to Detect a Ratio of Environmental Inputs	2012 : Team UANL_Mty-Mexico: Arsenic biosensor and arsenic recovery.
		2010 : Team EPF_Lausanne: Asaia, the pink force against malaria					2012 : Team Caltech: Maipulating bacteria to degrade stable organic polymers such as lignin and alginate, and using them to synthesize biofuels (Ethanol).	2010 : Team Tec-Monterrey: Development of a genetic frame for the creation of a concentration-sensitive bacterial sensor
		2010 : Team Freiburg_Bioware: A Modular Virus Construction Kit for Therapeutic Applications					2012 : Team HokkaidoU_Japan: Bio-capsule E. coli for the production of P3HB bioplastic	2010 : Team Tianjin: Lignin degreadation yeast
		2010 : Team Heidelberg: miBricks: DNA is not enough					2012 : Team NCTU_Formosa: Ecofuel E.coline. Enhenced roduction of Isobutanol in E. coli.	2010 : Team Toronto: Enhanced Catechol Degradation via Metabolic Channeling in E. coli
		2010 : Team HKUST: Engineered Lactobacillus against S. aureus Infection					2012 : Team Tokyo_Tech: Biosynthesis of the bioplastic Polyhydroixyalkanoates (PHA).	2010 : Team TU_Delft: Alkanivore: Enabling hydrocarbon degradation in aqueous environments
		2010 : Team HokkaidoU_Japan: Dr. E. coli: World Smallest Protein Injector					2012 : Team UT-Tokyo: Sweetaholic Energy Generator: Hydrogen Production from Sugar-rich Waste by E. coli	2010 : Team UIUC-Illinois: sRNAs in Artifical Gene Circuits and Bioremediation Applications
		2010 : Team IIT_Delhi_1: Dr.coli creating artificial glands for diseases such as insulin.					2012 : Team HUST-China: Lignocellulose Decomposer. Using Cellulose to generate Ethanol.	2010 : Team UTDallas: Enlisting E. Scherichia Holmes: A modular whole-cell biosensor for the detection of environmental pollutants
		2010 : Team INSA-Lyon: Droppy Coli : factory of PHB, application and improvement					2012 : Team METU: Degradation o fCarbon monoxyde into CO2 biologically, which is then converted into biomass.	2011 : Team Berkeley: DETECTR
		2010 : Team SJTU-BioX-Shanghai: Synthetic-biological Approaches to Osteoarthritis					2012 : Team TU_Darmstadt:PET waste bacterial recycling system.	2011 : Team Calgary: Senseomonas NAstytoxins NAs are toxic surfactants released into tailings ponds as a by-product of the bitumen extraction process of oil sands
		2010 : Team St_Andrews: Tackling Vibrio cholerae by introducing genetically re-engineered Escherichia coli to the human alimentary tract					2012 : Team Costa_Rica-TEC-UNA: Cibus 3.0 for biodiesel production using dairy industry wastes.	2011 : Team Caltech: Bioremediation of Endocrine Disruptors Using Genetically Modified Escherichia Coli
		2010 : Team Stockholm: Spot on Treatment						2011 : Team Colombia: Bacterial prevention of rust headaches
		2010 : Team Tokyo-NoKoGen: An EcoTanker for the easy collection and delivery of target compounds						2011 : Team Gaston_Day_School: Red Fluorescent Nitrate Detector
		2010 : Team UCSF: Synthetic Killers - engineering immune cells for cancer therap						2011 : Team Lethbridge: Tailings pond clean up kit, a synthetic biology approach to bioremediation
		2010 : Team Warsaw: An universal platform for protein delivery to the mammalian cells						2011 : Team Northwestern: My NU P.A.L.biosensor capable of detecting the presence of P. Aeruginosa both quickly and effectively.
		2010 : Team Washington: Antibiotics for the 21st Century						2011 : Team Panama: Alternative E. coli Oil Spill Bioremediation Kit
		2010 : Team Wisconsin-Madison: Universal Platform for Polypeptide Delivery: Intelligent Delivery of Ingestible Enzyme Treatment (iDIET)						2011 : Team Penn_State: Bacterial Dosimeter--Detecting Levels of Harmful Radiation
		2011 : Team GeorgiaTech: De Novo Adaptation of Streptococcus thermophilus CRISPR1 Defense in Bacillus Subtilis						2011 : Team Queens_Canada: Nemoremediation: Engineering C. Elegans into a Toolkit for Soil Bioremediation
		2011 : Team Grinnell: Exploiting the Secretion System of Environmental Caulobacter crescentus to Deliver Biofilm-inhibiting Proteins						2011 : Team Osaka: Bio-dosimeter
		2011 : Team UNICAMP-EMSE_Brazil: STRESS WARS – Jedi bacteria designed to fight against stress derived immune imbalance						2011 : Team SYSU-China: Nuclear-Leakage Rescuer
		2011 : Team UT_Dallas: “Immunobots: a step towards intelligent probiotics”						2011 : Team Tokyo-NoKoGen: EcoLion - an E. coli collecting heavy metal ions in BMC
		2011 : Team Virginia: A Synthetic Biology Approach to Promoting Angiogenesis at Traumatic Wound Sites						2011 : Team Bielefeld-Germany: The Bisphenol A-Team: A Cell-free Approach for Biosensors
		2011 : Team HokkaidoU_Japan: Advancement of Dr. E. coli: The world's smallest protein injector						2011 : Team Bilkent_UNAM_Turkey: Biodegradation of TNT and TNT derivatives by nfsI-transfected Chlamydomonas reinhardtii
		2011 : Team KIT-Kyoto: Mr.D -who will cure leukemia-						2011 : Team ETH_Zurich: SmoColi bacterio-quantifier of acetaldehyde concentration
		2011 : Team Potsdam_Bioware: Modification, Selection and Production of Cyclic Peptides for Therapy						2011 : Team Grenoble: MercuroColi: A new way to quantify heavy metals.
		2011 : Team UST-Beijing: Gene H-transfer: bile acid receptor in E.coli & proteorhodpsin in mitochindrial inner membrane						2011 : Team Imperial_College_London: When AuxIn met Root By improving root growth, the AuxIn system provides a synthetic biology approach to tackling worldwide problems such as soil erosion and desertification.
		2012 : Team NTU_Taida: The Fat Extinguisher and Thermal Avenger. Using GLP-1 endogenous hormonal system as a delivery pathway for therapeutics.						2011 : Team LMU-Munich: WOO-HOO! - The Bacterial Heavy Metal Detector Kit
		2012 : Team Wageningen_UR: A standardized tool for site specific drug delivery using virus-like particules.						2011 : Team Lyon-INSA-ENS: "Cobalt Buster" : decontamination of trace cobalt from radioactive effluents.
		2012 : Team Potsdam_Bioware: Antibody production in CHO cell culture.						2011 : Team Valencia: "Water Colicin Cleaner: disinfected water by E. coli"
		2012 : Team Slovenia: SwitchIT, inducible therapeutics. Using microencapsulted engineered mammalian cells to produce different therapeutics.						2012 : Team Gaston_Day_School: Detection of Heavy Metal Contaminants in water using bacteria
		2012 : Team Tec-Monterrey_EKAM: Modular terpenoid Biofactory. Terpenoids have anti-inflammatory, anti-neoplastic, anti-malarial and anti-bacterial qualities.						2012 : Team Cornell: Novel arsenic and naphthalene bacteriosensors intended for continuous monitoring of water quality in areas affected by oil and gas extraction
								2012 : Team IvyTech-South_Bend: The Arsenator. A Tuneable Biosensor for Arsenic.
								2012 : Team Stanford-Brown: Synthetic AstroBiology
								2012 : Team Osaka: Bio-dosimeter. Introducing damage tolerance and radiation detection in E. coli.
								2012 : Team OUC-China: Phosphate and nitrate biosensors
								2012 : Team Amsterdam: Cellular Logbook - A methylation-based reporter system.
								2012 : Team Tuebingen: Expression of membrane progesterone receptors from different species in yeast to reliably measure steroid concentration in water by inducing bioluminescence
								2012 : Team NRP-UEA-Norwich: Nitric Oxide biosensor
								2012 : Team Panama_INDICASAT: Biosensor for cyanide compounds
								2012 : Team Ciencas-UNAM: Biosensor for CO2
